# Supplementary material for: Vast cryptic diversity in direct-developing frogs Pristimantis (Anura: Strabomantidae): a new subgenus and the description of a new species from the eastern Andes of Ecuador
Source: PeerJ. 2025 Dec 17;13:e20512. doi: 10.7717/peerj.20512 (PMC12717849; doi:10.7717/peerj.20512)
Supplement: Supplemental Information 6 — Sequences generated with Oxford Nanopore Technology sequencing. [file peerj-13-20512-s006.xlsx]

## Sheet: Hoja1
Supplementary Table S1. Genbank accession numbers corresponding to species assigned to the subgenus Cryptomantis. + Sequences generated with Oxford Nanopore Technology sequencing.
Voucher	Species	12 S	16 S	RAG 1	COI
DHMECN 15588	P. paganus sp. nov.	PQ758797	PQ754381	PQ901894	PQ891898
DHMECN 15589	P. paganus sp. nov.	PQ758798	PQ754382	PQ901895	PQ891899
DHMECN 15590	P. paganus sp. nov.	PQ758799	PQ754383	PQ901896	PQ891900
DHMECN 15591	P. paganus sp. nov.	PQ758800	PQ754384	PQ901897	PQ891901
DHMECN 15688	P. paganus sp. nov.	-	-	-	PQ891902
DHMECN 16770	P. paganus sp. nov.	-	PQ754385	-	-
DHMECN 16810+	P. paganus sp. nov.	PQ760295	PQ760295	PQ901888	PQ891911
DHMECN 16811+	P. paganus sp. nov.	PQ760296	PQ760296	PQ901889	PQ891912
DHMECN 19962+	P. paganus sp. nov.	PQ760297	PQ760297	-	-
DHMECN 19963+	P. paganus sp. nov.	PQ760298	PQ760298	-	-
QCAZ 45803	P. paganus sp. nov.	-	ON468427.1	-	-
QCAZ 45805	P. paganus sp. nov.	-	ON468428.1	-	-
DHMECN 12358+	Pristimantis bicantus	PQ760288	PQ760288	PQ901880	PQ891905
DHMECN 12359+	Pristimantis bicantus	PQ756952	PQ759001	PQ901881	PQ891906
DHMECN 17848+	Pristimantis bicantus	PQ760289	PQ760289	PQ901890	PQ891907
DHMECN 17849+	Pristimantis bicantus	PQ760290	PQ760290	PQ901891	PQ891908
QCAZ 16186	Pristimantis bicantus	-	MZ429988.1	MZ560969.1	-
QCAZ 58597	Pristimantis bicantus	MZ330732.1	MZ429995.1	-	-
QCAZ 58592	Pristimantis bicantus	-	MK829657.1	-	-
DHMECN 14479+	Pristimantis burtoniorum	PQ760304	PQ760304	PQ901892	-
DHMECN 15674	Pristimantis c.sp. 1	PQ758801	-	-	PQ891903
DHMECN 15675	Pristimantis c.sp. 1	PQ758802	PQ754386	PQ901898	PQ891904
QCAZ 52515	Pristimantis c.sp. 1	-	MZ430014.1	MZ332945.1	-
QCAZ 58963	Pristimantis c.sp. 1	-	MZ430015.1	MZ332950.1	-
QCAZ 59480	Pristimantis c.sp. 1	-	MZ241519.1	-	-
QCAZ 59586	Pristimantis c.sp. 1	-	MZ430013.1	MZ332955.1	-
QCAZ 59603	Pristimantis c.sp. 1	-	MZ241524.1	MZ332956.1	-
QCAZ 46223	Pristimantis c.sp. 2	-	MZ241505.1	MZ332941.1	-
QCAZ 70020	Pristimantis c.sp. 2	-	MZ430055.1	-	-
QCAZ 51561	Pristimantis c.sp. 3	-	ON468430.1	-	-
QCAZ 51553	Pristimantis c.sp. 3	-	MZ241506.1	MZ332942.1	-
QCAZ 24653	Pristimantis c.sp. 4	-	ON468425.1	-	-
QCAZ 31985	Pristimantis c.sp. 5	-	MZ429989.1	MZ560970.1	-
QCAZ 31986	Pristimantis c.sp. 5	-	MZ241488.1	MZ332925.1	-
QCAZ 31988	Pristimantis c.sp. 5	-	ON468424.1	MZ560971.1	-
QCAZ 46184	Pristimantis c.sp. 5	-	MZ241504.1	MZ332940.1	-
QCAZ 52466	Pristimantis c.sp. 5	-	ON468432.1	-	-
QCAZ 52464	Pristimantis c.sp. 5	-	ON468431.1	-	-
QCAZ 52489	Pristimantis c.sp. 5	-	MZ241507.1	MZ332943.1	-
QCAZ 56440	Pristimantis c.sp. 5	-	MZ241513.1	MZ332948.1	-
QCAZ 58972	Pristimantis c.sp. 5	-	MZ241516.1	MZ332951.1	-
DHMECN 15608	Pristimantis ganonotus	PQ758796	PQ754380	PQ901893	-
DHMECN 19960+	Pristimantis ganonotus	PQ760291	PQ760291	-	-
DHMECN 19961+	Pristimantis ganonotus	PQ760292	PQ760292	-	-
DHMECN 14444+	Pristimantis marcoreyesi	PQ760293	PQ760293	PQ901885	PQ891909
DHMECN 16204+	Pristimantis marcoreyesi	PQ760294	PQ760294	PQ901887	PQ891910
QCAZ 37182	Pristimantis nelsongalloi	-	ON468426.1	-	-
QCAZ 49035	Pristimantis nelsongalloi	-	ON468429.1	-	-
QCAZ 31860	Pristimantis nelsongalloi	-	MZ241485.1	MZ560976.1	-
QCAZ 31861	Pristimantis nelsongalloi	-	MZ430006.1	MZ332923.1	-
QCAZ 59202	Pristimantis nelsongalloi	MZ474481.1	MZ430007.1	-	-
QCAZ 59211	Pristimantis nelsongalloi	-	MK829661.1	-	-
DHMECN 11563+	Pristimantis prolatus	PQ756953	PQ759002	PQ901877	PQ891913
DHMECN 11564+	Pristimantis prolatus	PQ760299	PQ760299	PQ901878	PQ891914
DHMECN 11572+	Pristimantis prolatus	PQ760300	PQ760300	PQ901879	PQ891915
KU177433	Pristimantis prolatus	EU186701.1	EU186701.1	-	-
QCAZ 52496	Pristimantis sacharuna	-	MZ241508.1	MZ332944.1	-
QCAZ 69791	Pristimantis tungurahua	-	MZ241535.1	-	-
DHMECN 14427+	Pristimantis tungurahua	PQ756954	PQ759003	PQ901882	PQ891916
DHMECN 14428+	Pristimantis tungurahua	PQ760301	PQ760301	PQ901883	PQ891917
DHMECN 14429+	Pristimantis tungurahua	PQ760302	PQ760302	PQ901884	PQ891918
DHMECN 14445+	Pristimantis tungurahua	PQ760303	PQ760303	PQ901886	PQ891919
