# Supplementary material for: Vast cryptic diversity in direct-developing frogs Pristimantis (Anura: Strabomantidae): a new subgenus and the description of a new species from the eastern Andes of Ecuador
Source: PeerJ. 2025 Dec 17;13:e20512. doi: 10.7717/peerj.20512 (PMC12717849; doi:10.7717/peerj.20512)
Supplement: Supplemental Information 7 — Universal Oxford Nanopore Technology adapters were attached to Forward (TTTCTGTTGGTGCTGATATTGC) and Reverse (ACTTGCCTGTCGCTCTATCTTC) primers. [file peerj-13-20512-s007.xlsx]

## Sheet: Hoja2
Supplementary Table ST2. Primers used to amplify the three mitochondrial and one nuclear gene in this study. Universal Oxford Nanopore Technology adapters were attached to Forward (TTTCTGTTGGTGCTGATATTGC) and Reverse (ACTTGCCTGTCGCTCTATCTTC) primers.
Gene Region	Primer	Read direction	Primer sequence (5'–3')	Thermocycler program	Source
16S rRNA	16sSar-L	forward	CGCCTGTTTATCAAAAACAT	95° 5'; (95° 30", 57° 30", 72° 45")x30; 72° 5'	Palumbi et al.
	16sSbr-H	reverse	CCGGTCTGAACTCAGATCACGT
12S rRNA	12sL4E	forward	TACACATGCAAGTYTCCGC	94° 5'; (94° 30", 49° 30", 72° 60")x38; 72° 7'	Heinicke et al.
	12sH10	reverse	CACYTTCCRGTRCRYTTACCRTGTTACGACTT
COI	dgLCO-1490	forward	GGTCAACAAATCATAAAGAYATYGG	95° 5'; (95° 30", 48° 30", 72° 45")x30; 72° 5'	Meyer & Paulay
	dgHCO-2198	reverse	TAAACTTCAGGGTGACCAAARAAYCA
RAG1	R182	forward	GCCATAACTGCTGGAGCATYAT	94° 5'; (94° 30", 52° 30", 72° 60")x38; 72° 7'	Hedges et al.
	R270	reverse	AGYAGATGTTGCCTGGGTCTTC
12S rRNA & 16S rRNA	12sL4E	forward	TACACATGCAAGTYTCCGC	94° 5'; (94° 45", 54° 45", 72° 2' )x5; (94° 45", 53° 45", 72° 2')x10; (94° 45", 51° 45", 72° 2')x30; 72° 10'	This paper
	16sSbr-H	reverse	CCGGTCTGAACTCAGATCACGT
