# Supplementary material for: Vast cryptic diversity in direct-developing frogs Pristimantis (Anura: Strabomantidae): a new subgenus and the description of a new species from the eastern Andes of Ecuador
Source: PeerJ. 2025 Dec 17;13:e20512. doi: 10.7717/peerj.20512 (PMC12717849; doi:10.7717/peerj.20512)
Supplement: Supplemental Information 8 — The minimum, maximum and standard deviation are shown above the diagonal. [file peerj-13-20512-s008.xlsx]

## Sheet: Hoja1
Supplementary Table ST3. Mean interspecific genetic p-distances (values below the diagonal) in the 16S rRNA gene between species of the subgenus Cryptomantis. The minimum. maximum and standard deviation are shown above the diagonal.
	P. paganus sp. nov	P. bicantus	P. marcoreyesi	P. nelsongalloi	P. sacharuna	P. tungurahua	P. prolatus	P. burtoniorum	P. ganonotus	P. c.sp. 1	P. c.sp. 2	P. c.sp. 3	P. c.sp. 4	P. c.sp. 5
P. paganus sp. nov		0.031-0.08 (±0.01)	0.024-0.031 (±0.002)	0.036-0.105 (±0.015)	0.032-0.077 (±0.013)	0.046-0.076 (±0.01)	0.115-0.146 (±0.01)	0.124-0.136 (±0.004)	0.136-0.158 (±0.007)	0.048-0.062 (±0.01)	0.03-0.062 (±0.01)	0.048-0.062 (±0.07)	0.046-0.067 (±0.01)	0.025-0.07 (±0.013)
P. bicantus	6.5%		0.051-0.086 (±0.01)	0.034-0.11 (±0.015)	0.047-0.051 (±0.002)	0.025-0.072 (±0.011)	0.109-0.166 (±0.014)	0.124-0.152 (±0.01)	0.085-0.172 (±0.018)	0.053-0.185 (±0.03)	0.044-0.095 (±0.013)	0.025-0.059 (±0.008)	0.039-0.051 (±0.004)	0.018-0.046 (±0.008)
P. marcoreyesi	2.8%	7.2%		0.074-0.103 (±0.01)	0.058	0.044-0.091 (±0.015)	0.118-0.144 (±0.012)	0.119-0.159 (±0.001)	0.144-0.155 (±0.005)	0.077-0.173 (±0.04)	0.047-0.067 (±0.011)	0.021-0.161 (0.06±0.034)	0.068-0.068 (±0)	0.064-0.318 (±0.086)
P. nelsongalloi	7.5%	6.4%	8.4%		0.039-0.056 (±0.01)	0.029-0.093 (±0.015)	0.099-0.171 (±0.017)	0.136-0.159 (±0.009)	0.099-0.197 (±0.025)	0.139-0.198 (±0.011)	0.08-0.116 (±0.012)	0.029-0.084 (±0.016)	0.05-0.084 (±0.013)	0.044-0.099 (±0.014)
P. sacharuna	4.5%	4.8%	5.8%	4.5%		0.047	0.093-0.113 ( ±0.01)	-	0.07	0.11	0.08	0.041-0.055 (0.048±0.01)	0.039	0.076
P. tungurahua	5.2%	6.2%	6.9%	6.6%	4.7%		0.101-0.144 (±0.01)	0.115-0.144 (±0.01)	0.089-0.164 (±0.019)	0.043-0.16 (±0.033)	0.039-0.099 (±0.02)	0.035-0.051 (±0.006)	0.037-0.065 (±0.011)	0.047-0.075 (±0.009)
P. prolatus	13.6%	14.5%	13.7%	14.8%	9.8%	13.5%		0.108-0.128 (±0.009)	0.157-0.194 (±0.011)	0.021-0.055 (±0.01)	0.087-0.153 (±0.023)	0.121-0.142 (±0.007)	0.124-0.146 (±0.01)	0.094-0.162 (±0.019)
P. burtoniorum	12.8%	13.9%	12.1%	14.4%	-	12.9%	12.2%		0.162-0.185 (±0.013)	0.139-0.15 (±0.004)	0.129-0.14 (±0.008)	0.11-0.129 (±0.013)	0.12	0.131-0.182 (±0.016)
P. ganonotus	14.8%	15.9%	14.8%	16.2%	0.07	15.1%	17.4%	17.2%		0.134-0.19 (±0.018)	0.064-0.166 (±0.04)	0.129-0.155 (±0.011)	0.153-0.169 (±0.009)	0.072-0.367 (±0.077)
P. c.sp. 1	13.1%	16.3%	14.5%	14.1%	5.7%	12.3%	6.9%	16.3%	17.7%		0.073-0.174 (±0.04)	0.081-0.149 (±0.03)	0.154-0.162 (±0.003)	0.161-0.182 (±0.005)
P. c.sp. 2	3.7%	8.1%	5.7%	9.1%	8.4%	8.2%	13.8%	13.5%	14.5%	14.4%		0.036-0.073 (±0.017)	0.07-0.078 (±0.006)	0.071-0.101 (±0.008)
P. c.sp. 3	5.3%	4.8%	5.6%	4.9%	4.8%	4.1%	13.2%	12.1%	14.3%	12.2	6.1%		0.024-0.034 (±0.007)	0.038-0.047 (±0.003)
P. c.sp. 4	5.7%	4.5%	6.8%	5.8%	3.9%	5.5%	0.14	12.2%	15.8%	15.7%	7.4%	2.9%		0.038-0.354 (±0.118)
P. c.sp. 5	5.3%	2.6%	11.4%	8.1%	7.6%	6.2%	17.8	16.7%	15.9%	15.8%	8.2%	4.1%	8.7%
