# Supplementary material for: Vast cryptic diversity in direct-developing frogs Pristimantis (Anura: Strabomantidae): a new subgenus and the description of a new species from the eastern Andes of Ecuador
Source: PeerJ. 2025 Dec 17;13:e20512. doi: 10.7717/peerj.20512 (PMC12717849; doi:10.7717/peerj.20512)
Supplement: Supplemental Information 9 — Comparison of Pristimantis paganus sp. nov. and its nominal sister species in the Cryptomantis subgenus. [file peerj-13-20512-s009.xlsx]

## Sheet: Hoja1
Supplementary Table ST4. Qualitative morphological characters used for comparison of Pristimantis paganus sp. nov. and its nominal sister species in the Cryptomantis subgenus.
Species	SVL (mm)		Disc shape	Lateral cutaneous ridges on hands	Ulnar tubercles	Tubercles in heels	Tubercles on external border of the tarsus	Internal metatarsal tubercle	External metatarsal tubercle	Supernumerary tubercles	Lateral cutaneous ridges on feet	Toe conditicion V	Interdigital membranes	Dermal fold	Interocular fold	Discoidal fold	Tympanum	Snout in dorsal view	Snout in profile view	Upper eyelid tubercles	Cranial crests	Dentigerous processes of vomers	Vocal slits	Nupcial pads	Finger I of the hand	Altitudinal range (m.a.s.l.)	Coloring in life	Source
	Female	Male
P. paganus sp. nov.	24.8 –29.8	17.20–21.5	Expanded	Present	Absent	Subconical tubercle	Two flattened tubercles	Oval in females	Rounded	Absent	Present	B	Absent	Defined and discontinuous dorsolateral dermal folds on the dorsum in females, defined continuous in males	Absent	Present and visible posteriorly	Present	Subacuminate	Rounded	Present, 3 to 4 rounded tubercles surrounded by several small tubercles	Absent	Oblique	Indistinct	Absent	I<II	2157 – 2495	Females dorsally black with distinct pinkish (grayish cream in life) flank and throat markings. Males dorsally brown with dark brown W-shaped and inverted V-shaped markings on dorsum, with orange-brown spots on nasal region and insertions of axillae and groin.	This study
P. bicantus	17.0–21.7	12.0–15.8	Slightly expanded	Absent	Absent	Absent	Absent	Oval	Round	-	Absent	B	Absent	Absent	Absent	-	Present	Rounded	Rounded	Present, low tubercles	Absent	Prominent, oblique	Present	Absent	I<II	2000 – 2300	The following description includes the color variation found in Pristimantis bicantus. Dorsum light to dark brown usually with an indistinct dark interorbital bar and with or without dark chevron markings; some individuals with light dorsolateral line and some with pale snout; dorsal surfaces of legs with contrasting dark and light bars; distinct dark line extending from posterior edge of eye, th…	Guayasamin and Funk
P. burtoniorum	20.8–27.0	16.6–17.4	Terminal discs	Present	Small, conical	Small conical tuber	Present, round-shaped	Oval	Rounded	Present	Present	B	Absent	Absent	Absent	Present and defined	Present	Subacuminate	Subacuminate	Present, three to four large subconical tubercles	Absent	Oval	Absent	Weakly defined	I<II	2940 – 2970	Dorsal colouration grey with transversal marks dark brown, legs and arms with diagonal bands dark brown with interspaces pink (red in life), flanks with oblique bands finely delineated by cream, hidden surfaces of the venter and groin red; ventral colour grey dense, marked by dark brown, throat and outer mandibulae with dark brown marks, brownred iris and	Reyes-Puig et al.
P. ganonotus	-	14.0-15.2	Expanded	Absent	Indistinct	Nonconical	Absent	Oval	Oval, twice size of outer	Present plantar	Present	-	Absent	Absent	Absent	-	Present	Acuminate	Protruding	Absent	Absent	Absent	Present	Nonspinous nupcial pads on thumbs	I<II	1244 - 2200	The dorsal and dorsolateral surfaces of the body are green, except for the tympanum, which is creamy brown. The ventral surfaces are cream or white. The groin and the anterior and posterior surfaces of the thighs are yellow. The fingers of the hands and feet are translucent yellow	Hedges et al. / Bioweb (Coloration in life)
P. marcoreyesi	22.8–30.8	14.3–22.2	Slightly wider than the digits	Present	Small, flattened	Present, rounded	Present, weakly defined	Oval	Subconical	Absent	Present	C	Absent	Present, weakly defined	Absent	Present, weakly defined towards the ventral part	Present	Subacuminate	Angular	Present, two or more flattened to subconical tubercles	Absent	Oblique	Absent	Absent	I<II	2500 – 3100	Dorsally variable, from greenish brown to grayish brown to light gray; some individuals have dark brown or beige dorsal midline; specimens with greenish brown dorsal pattern, with distinctive rounded beige occipital marking. Cantal, supratympanic, labial bands, black ex-tremity bars and black W-shaped occipital marking. Belly in grayish cream to yellowish cream background, with black and dark bro…	Reyes-Puig et al.
P. nelsongalloi	12.0–17.0	18.5–21.7	Lanceolate discs	Absent	Present, small	One subconical and several small tubercles	Absent	Oval and slightly raised	Subconical, round	Present	Absent	B	Absent	Dorsolateral folds thin anteriorly and discontinuous posteriorly	Absent	Present	Present	Subacuminate	Rounded	Present, four or five small supraoculars, flat and low	Absent	Low, oblique	Absent	Absent	I<II	1627 – 1800	Dorsum yellowish tan to pale brown with darker markings, throat and venter bearing minute brown spots, iris yellowish bronze with median, horizontal reddish streak, all reticulated with black.	Valencia et al.
P. prolatus	20.8–24.1	13.7–18.4	Expanded	Absent	Absent	Present, conical	Present, conical	Elongated	-	Absent	Absent	-	Absent	"H" shaped	Absent	-	Present	Acuminate	Truncated	Present, one conical	Absent	Prominent, oblique and oval	Present	Absent	I<II	1140 – 1933	The back ranges from light brown to brown, with some individuals showing reddish, orange, or olive hues, marked with black or dark brown spots and a brown or orange occipital crest. Some individuals have yellow fringes dorsally and a golden tint on the upper lip. The groin and posterior surfaces of the thighs are brown to gray, with or without tiny light fringes. The belly ranges from dull cream …	Hedges et al.
P. sacharuna	18.5–19.5	-	Slightly wider than the digits, expanded, rounded	Present	Present, subconical	Subconical tubercle	Two to 3 subconical tubercles	Oval	Subconical	Absent	Present	B	Absent	W-shaped scapular fold followed by fine scapular fold in shaped of an inverted “V”	Present	Indistinct	Present	Subacuminate	Slightly rounded	Present, one subconical	Absent	Present	Unknown	Unknown	I<II	2200	Dorsum homogeneously dark brown, with a dark brown (reddish brown in life) “W” shaped occipital dermal ridge, with a pale (cream to creamy brown in life) inverted “V” shaped marking on scapular region; limbs banded dark brown, separated by cream brown interspaces; supratympanic band, canthal and two diagonal subocular bars dark brown (reddish brown in life); belly yellowish cream densely dotted w…	Reyes-Puig et al.
P. tungurahua	24.4–27.9	17.1–20.8	Rounds, expanded	Absent	Present, low	Present, conical	Present, conical	Oval	Round	Present	Absent	B	Absent	W-shape very evident in males, not very evident in females	Absent	Present	Present	Subacuminate	Protuberant	Present, one or two subconical tubercles	Absent	Triangulars	Absent	Absent	I<II	2500 – 2750	Females have an intense reddish-salmon color on the belly and hidden surfaces of the arms and legs; in males this coloration is restricted to the groin and armpits; the dorsal coloration of males and females has different shades of brown.	Reyes-Puig et al.
